# Supplementary material for: Structures, magnetic and catalytic properties of three sandwich-type silicotungstates containing tetranuclear copper(ii) clusters
Source: Royal Society of Chemistry journal article supplement (doi:10.1039/c0dt00322k), 2010-01-01
Supplement: c0dt00322k.pdf [file c0dt00322k.pdf]

## Supporting Information

# **Structures, Magnetic and Catalytic Properties of Three Sandwich-Type Silicotungstates Containing Tetranuclear Copper(II) Clusters**

Fan Yu, Yu-Xiang Long, Yan-Ping Ren, Xiang-Jian Kong,\* La-Sheng Long,\* Rong-Bin Huang and

Lan-Sun Zheng

*State Key Laboratory of Physical Chemistry of Solid Surface and Department of Chemistry, College of Chemistry and Chemical Engineering, Xiamen University, Xiamen 361005, China.*

Email: lslong@xmu.edu.cn, xjkong@xmu.edu.cn

### **Thermogravimetric analysis of 1, 2 and 3**

Thermogravimetric analysis (TGA) studies were performed in a N<sub>2</sub> atmosphere at a heating rate of 10 °C/min<sup>-1</sup> for complexes **1-3**. As shown in Fig.S1, the TGA diagram of **1** displays the weight loss of 11.5 % between room temperature and 400°C, which correspond to the removal of 22 guest water molecules, 12 NH<sub>3</sub> and 2 aqua molecules (calcd 11.8%). Between 400 and 900°C, **1** shows no weight loss. Similarly, the TGA curves of **2** and **3** display the weight loss of 10.3 % (calcd 8.7 % for **2**) and 11.4% (calcd. 10.0 % for **3**) respectively, which correspond to the loss of all the NH<sub>3</sub> and H<sub>2</sub>O molecules.

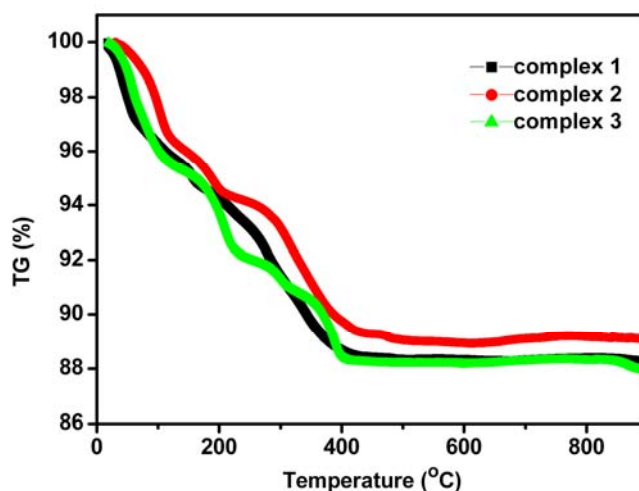

**Fig. S1** TGA curve for **1-3** over temperature range of 20-900 °C.

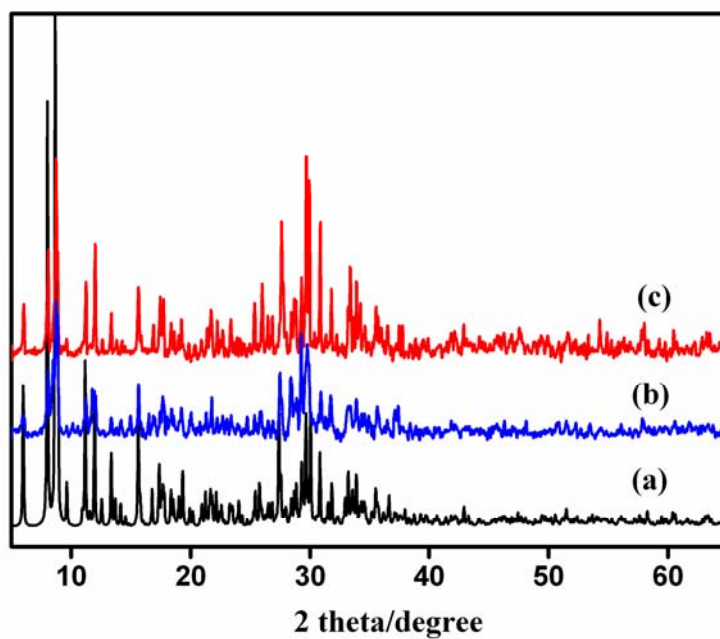

**Fig. S2** XRPD patterns of **1** (a) simulation based on the single-crystal structure; (b) the synthesized **1** at 298 K, (c) after reaction for 10 h at 343 K.

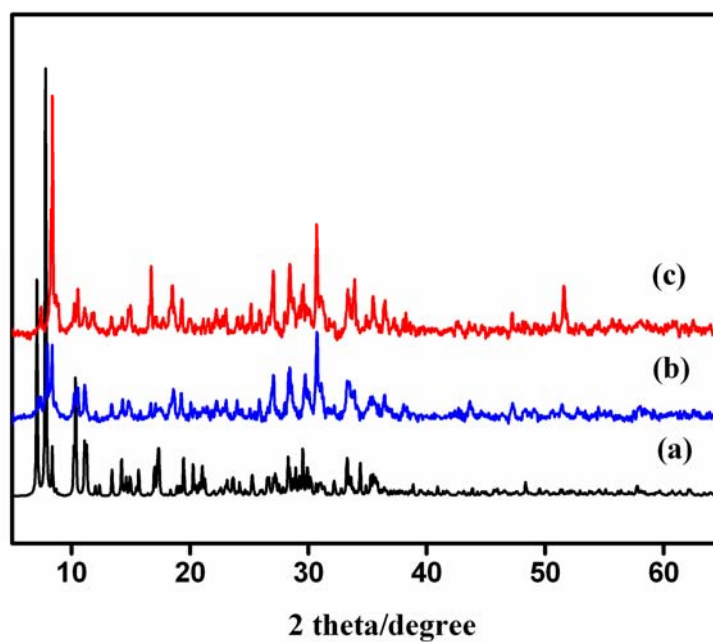

**Fig. S3** XRPD patterns of **2** (a) simulation based on the single-crystal structure; (b) the synthesized **2** at 298 K, (c) after reaction for 10 h at 343 K.

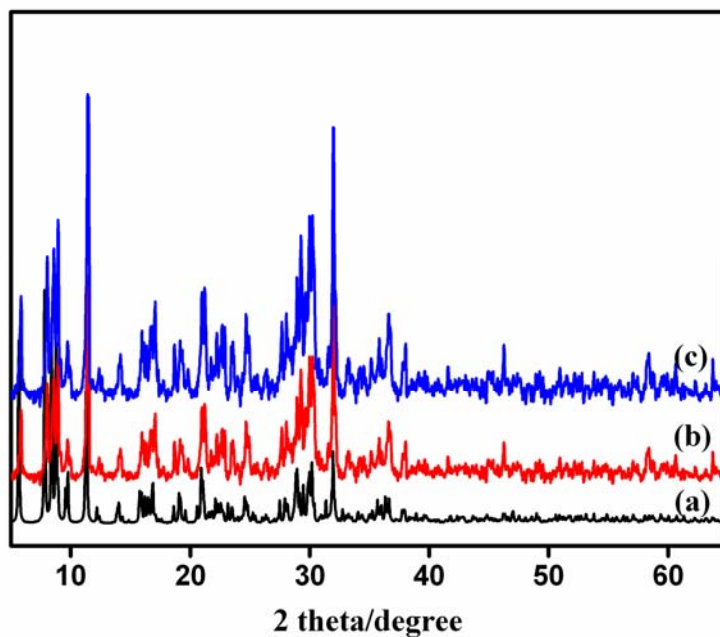

**Fig. S4** XRPD patterns of **3** (a) simulation based on the single-crystal structure; (b) the synthesized **3** at 298 K, (c) after reaction for 10 h at 343 K.

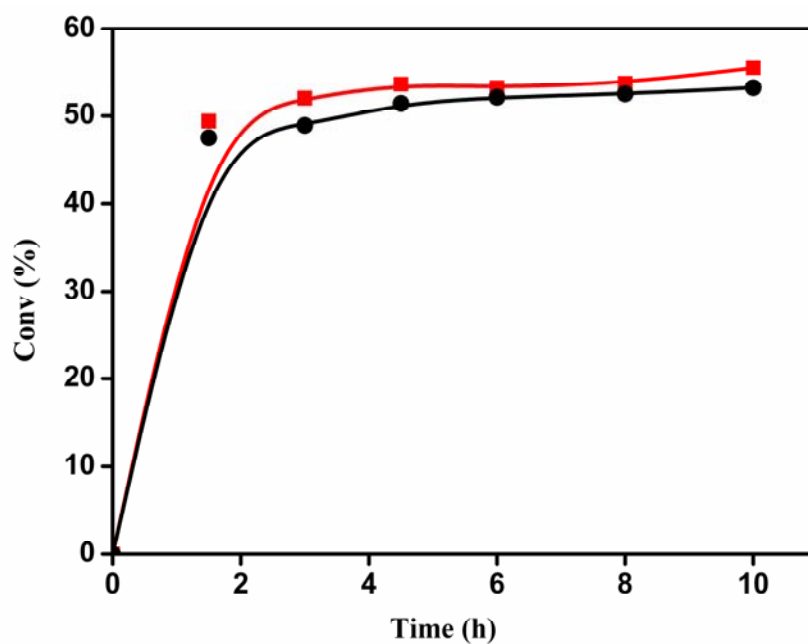

**Fig. S5** Reaction condition: ethylbenzene (0.3 mL, 2.44 mmol), catalyst (0.01 mmol), 70% TBHP (0.75 mL, 4.88 mmol), acetonitrile (8 mL) (■): fresh catalyst; (●): recycle for one time.
